# Supplementary figures and images for: Enhanced Amelioration of High-Fat Diet-Induced Fatty Liver by Docosahexaenoic Acid and Lysine Supplementations
Source: Hindawi journal article supplement (doi:10.1155/2014/310981), 2014-01-01

(a)

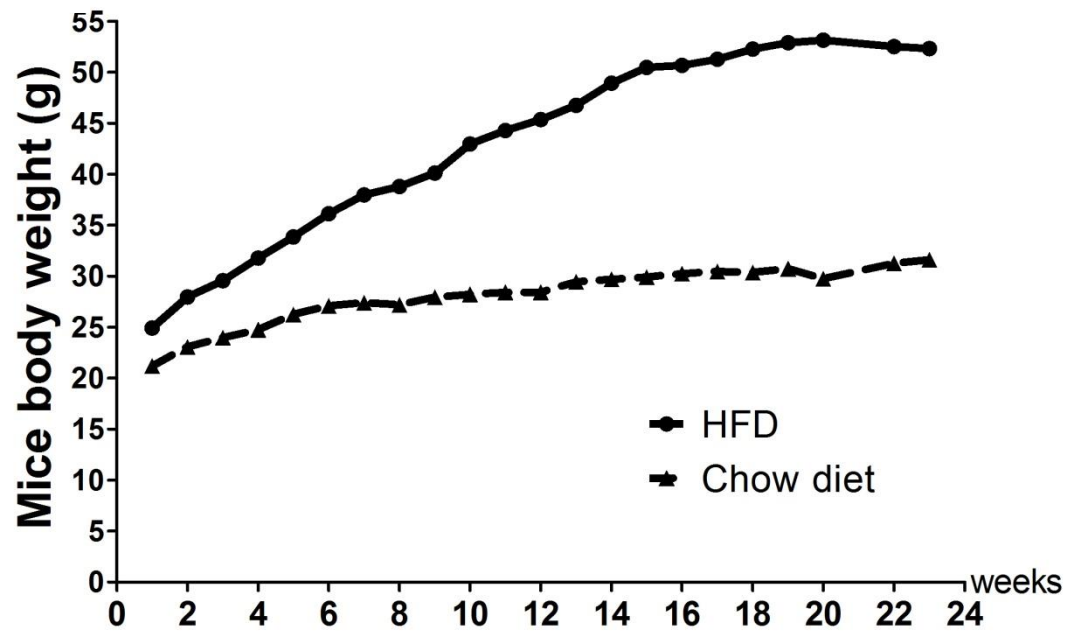

(b)

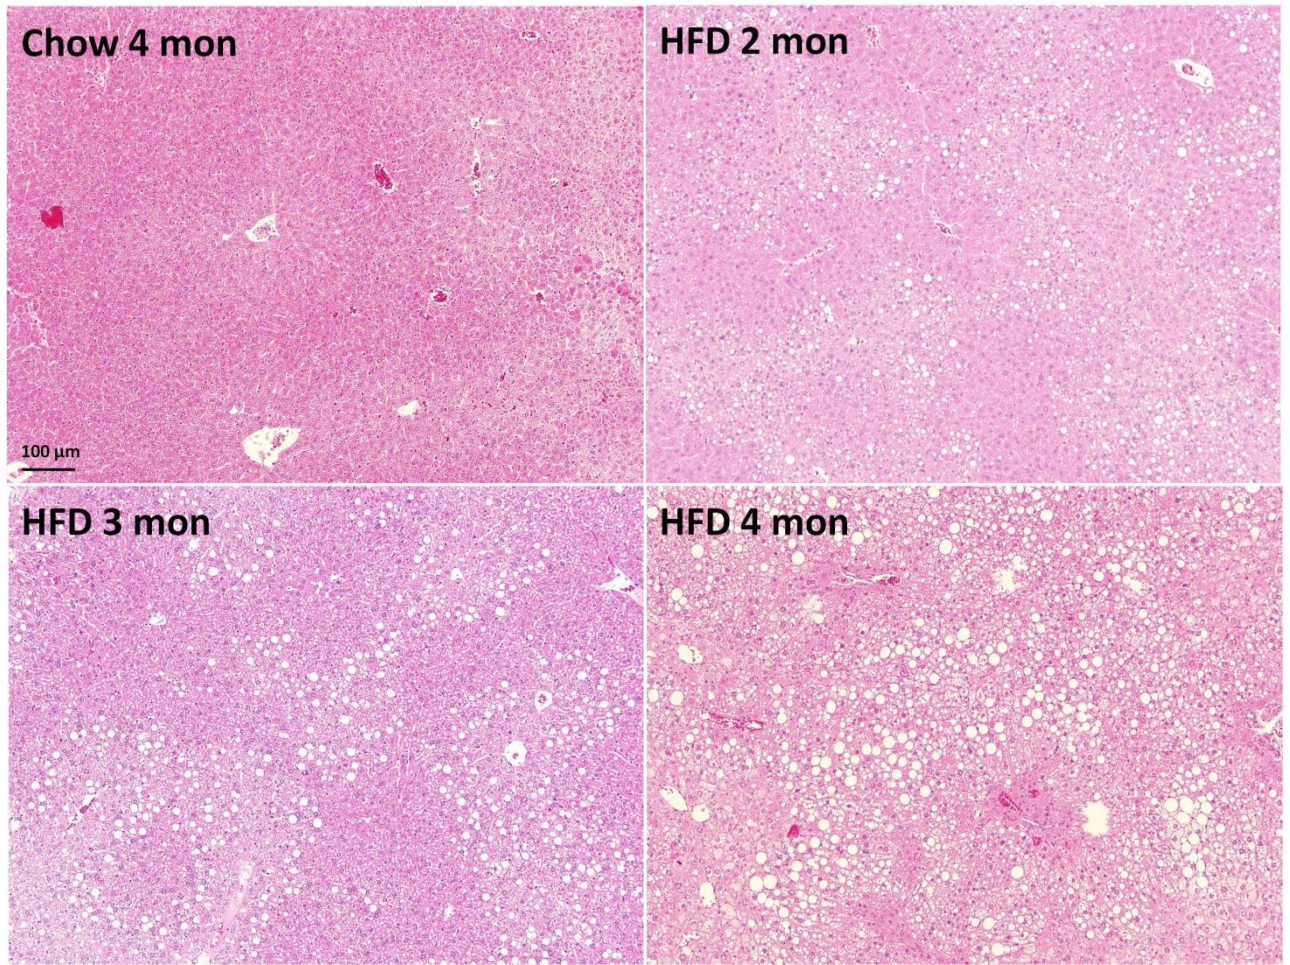



(c)

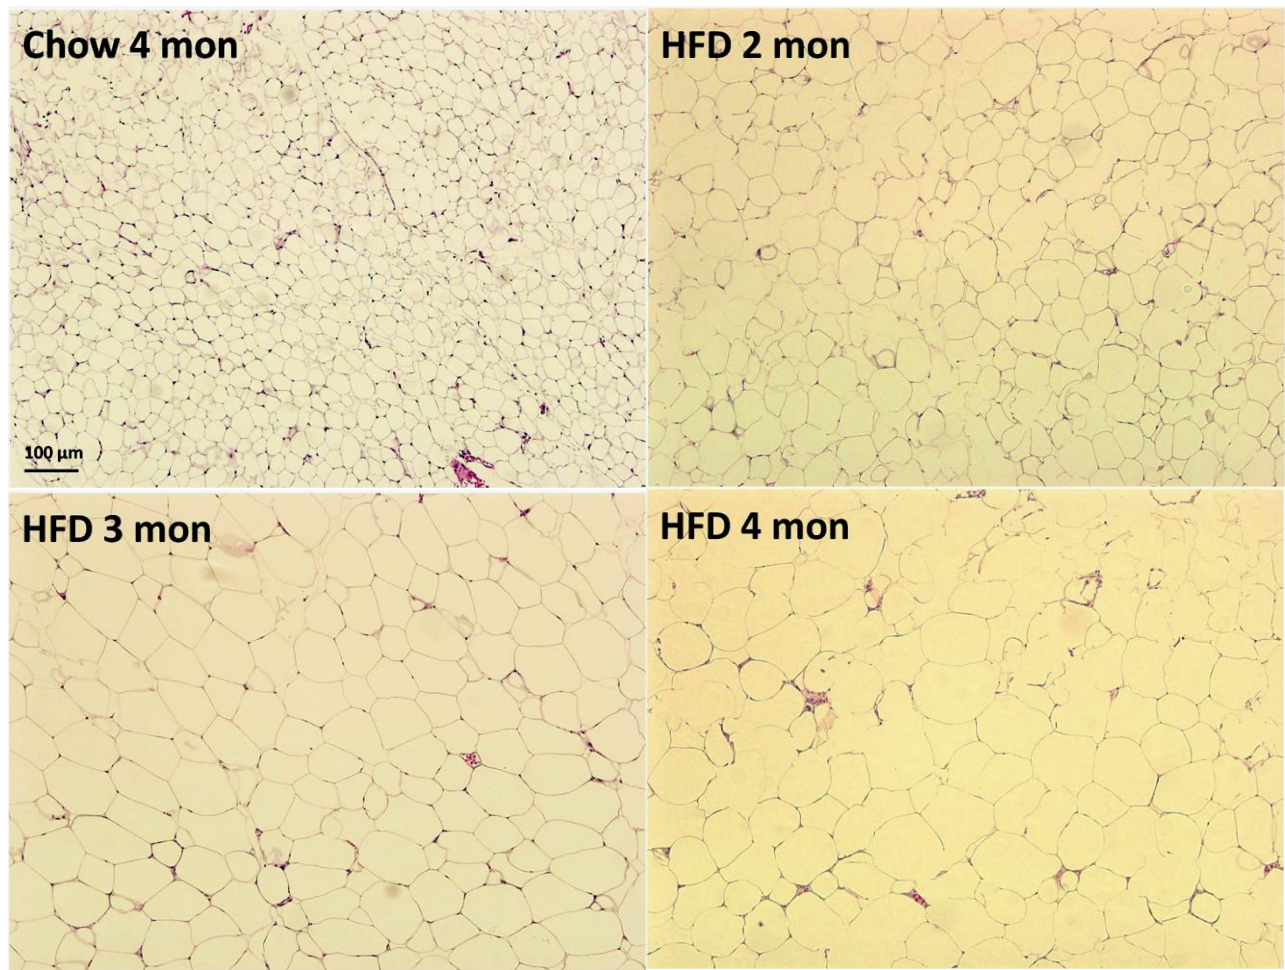

Supplement: f1 [file 310981.f1.zip]

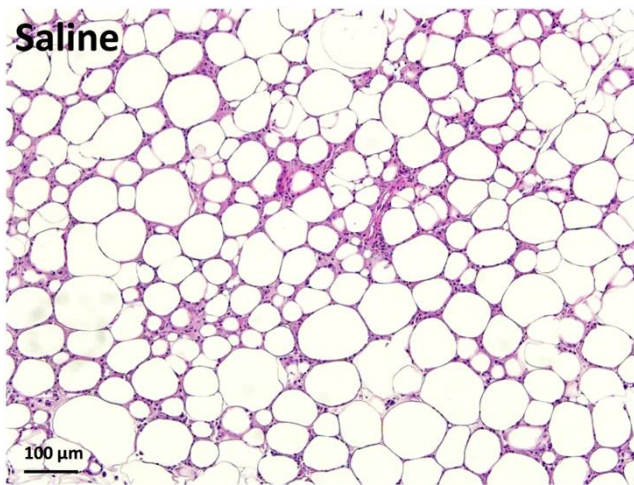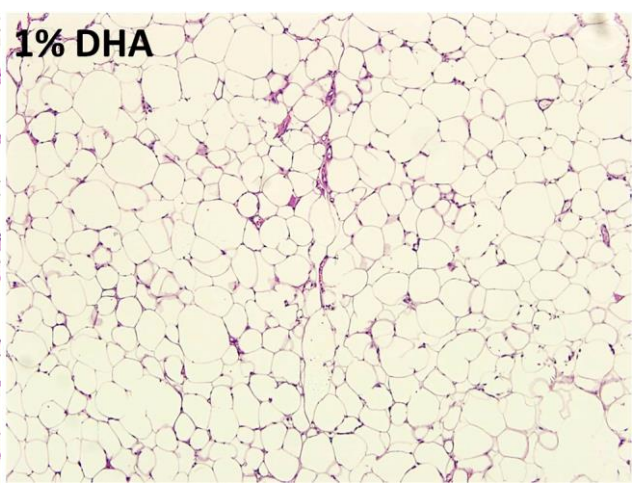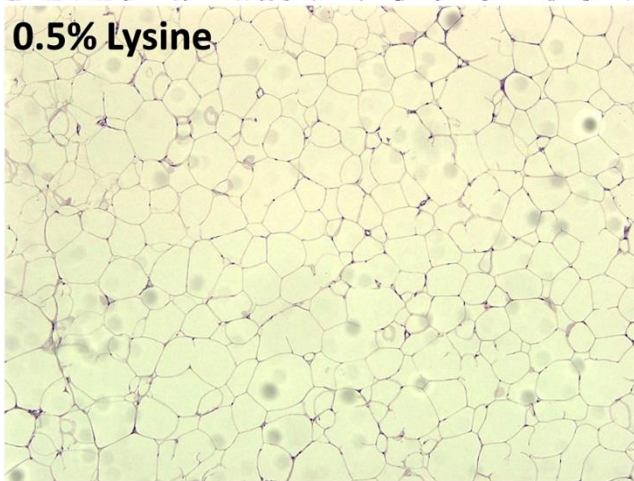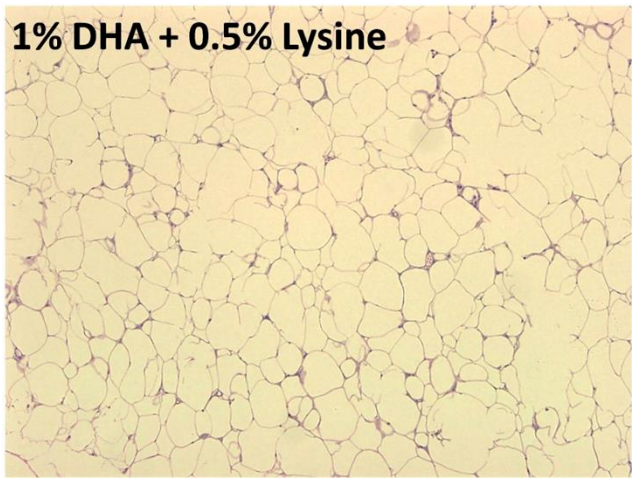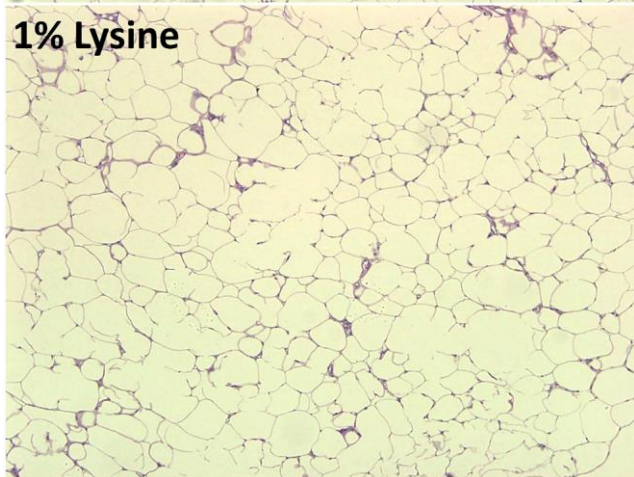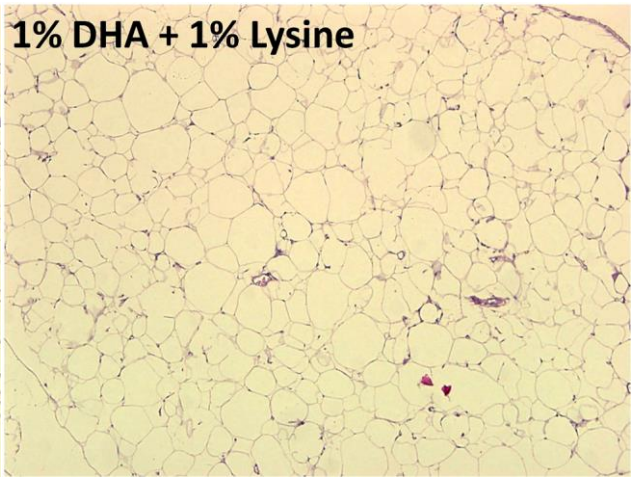

Supplement: f1 [file 310981.f1.zip]
